# Supplementary material for: Evaluation of environmental impacts of a perovskite solar cell with a p-i-n meso-superstructured architecture through life cycle assessment
Source: Royal Society of Chemistry journal article supplement (doi:10.1039/d4se01571a), 2025-01-01
Supplement: d4se01571a2.xlsx [file d4se01571a2.xlsx]

## Sheet: Impact Category
Environmental impacts - Functional unit : 1 cm2
Categoría de impacto	Metodo	Unidad	FEL	HTL	MSL	PAL	ETL	BEL	GB	total
CC	ReCiPe	kg CO2 eq	0.00250245	0.000208651	1.32909e-05	0.000595811	0.000241503	0.0064873	0.0052888	0.0153378
HTNC	ILCD	CTUh	6.33166e-10	4.1554e-11	3.99647e-12	1.69409e-10	3.648e-11	1.32307e-09	8.79457e-10	3.08713e-09
HTC	ILCD	CTUh	1.2073e-10	8.63847e-12	2.31496e-12	2.35453e-11	7.50137e-12	2.6667e-10	1.82168e-10	6.11569e-10
PM	ReCiPe	kg PM2.5 eq	1.3508e-06	9.35748e-08	8.31966e-09	3.8883e-07	1.41899e-07	2.73255e-06	2.31387e-06	7.02985e-06
AC	ILCD	molc H+ eq	1.51894e-05	1.5902e-06	9.58732e-08	4.16151e-06	1.10052e-06	4.59394e-05	3.88642e-05	0.000106941
FE	ReCiPe	kg P eq	8.10758e-07	4.48729e-08	4.05558e-09	1.55881e-07	4.84882e-08	1.40505e-06	9.4023e-07	3.40933e-06
EW	ILCD	CTUe	0.0522463	0.00855544	0.000588024	0.00710049	0.00245738	0.273	0.179774	0.523721
LU	ILCD	kg C deficit	0.00177973	9.79708e-05	9.30519e-06	0.000476729	0.00019809	0.00298798	0.00203	0.0075798
DWR	ILCD	m3 water eq	0.00177973	9.79708e-05	9.30519e-06	0.000476729	0.00019809	0.00298798	0.00203	0.0075798
DMFR	ILCD	kg Sb eq	2.32484e-05	8.77459e-08	9.57702e-09	1.05027e-06	4.51482e-07	2.59639e-06	2.14825e-06	2.95921e-05
CED	ILCD	MJ	0.0600264	0.00459533	0.000257613	0.0157579	0.00503654	0.143144	0.116325	0.345143
Vida útil (LT)		años	5	5	5	5	5
Eficiencia de conversión (n)		%	0.15	0.154	0.115	0.114	0.097
Relación del rendimiento del módulo (PR)		%	0.75	0.75	0.75	0.75	0.75
Constante de insolación		kWh /m2 – año	1700	1700	1700	1700	1700
Environmental impacts - Functional unit : 1 kWh
Impact Category		Unit	CSP 1	CSP 2	CSP 3	CSP 4	CSP 5
CC		g CO2 eq	26.1695	2.1253	0.181291	8.19829	3.90545
Impact Category	Metodo	Unit	FEL	HTL	MSL	PAL	ETL	BEL	GB	total
CC	ReCiPe	kg CO2 eq	0.163156	0.0136037	0.000866547	0.0388459	0.0157456	0.422961	0.344821	1
HNCT	ILCD	CTUh	0.205098	0.0134604	0.00129456	0.0548759	0.0118168	0.428576	0.284878	1
HCT	ILCD	CTUh	0.19741	0.0141251	0.00378528	0.0384999	0.0122658	0.436043	0.297871	1
PM	ReCiPe	kg PM2.5 eq	0.192153	0.0133111	0.00118348	0.0553113	0.0201852	0.388707	0.329149	1
AC	ILCD	molc H+ eq	0.142036	0.0148698	0.000896504	0.0389141	0.0102909	0.429577	0.363416	1
FE	ReCiPe	kg P eq	0.237805	0.0131618	0.00118955	0.0457219	0.0142222	0.412118	0.275781	1
EW	ILCD	CTUe	0.0997597	0.0163359	0.00112278	0.0135578	0.00469216	0.521269	0.343263	1
US	ILCD	kg C deficit	0.234799	0.0129253	0.00122763	0.0628947	0.0261339	0.394203	0.267817	1
DWR	ILCD	m3 water eq	0.234799	0.0129253	0.00122763	0.0628947	0.0261339	0.394203	0.267817	1
DMFR	ILCD	kg Sb eq	0.785628	0.00296518	0.000323634	0.0354916	0.0152568	0.0877392	0.0725954	1
Categoría de impacto	Unidad	C1	C2	C3	C4	C5
CC	kg CO2 eq	0.0153	0.0359	0.0361	0.049	0.0449
THNC	CTUh	3.09e-09	5.49e-08	5.5e-08	5.84e-08	5.73e-08
THC	CTUh	6.12e-10	6.53e-09	6.54e-09	7.46e-09	7.17e-09
MP	kg PM2.5 eq	7.03e-06	-	-	-	-
Ac	molc H+ eq	0.000107	-	-	-	-
EAD	kg P eq	3.41e-06	-	-	-	-
EA	CTUe	0.524	1.3037	1.3042	1.3822	1.3601
US	kg C deficit	0.00758	-	-	-	-
ARH	m3 water eq	0.00758	0.000212	0.000212	0.000292	0.000267
ARMFR	kg Sb eq	2.96e-05	3.2e-06	3.2e-06	3.26e-06	3.24e-06
DEA	MJ	0.345143	0.6597	0.6628	0.932	0.846

## Sheet: IA Normalizados
Impactos ambientales normalizados Ramirez et al. (2019)
Categoría de impacto	Total	PSC4.1. Capa de electrodo delantero	PSC4.5 Capa de transporte de electrones	PSC4.4. Capa de perovskita	PSC4.2- Capa de transporte de agujeros	PSC4.6. Capa de electrodo trasero	Globe box	PSC4.3. Capa de Soporte mesoporosa Alumina. Ramirez
Climate change	2.14614e-06	3.55722e-07	3.41589e-08	8.56231e-08	3.10684e-09	9.17583e-07	7.48064e-07	1.87991e-09
Human toxicity, non-cancer effects	1.97126e-05	4.10043e-06	2.35354e-07	1.1048e-06	3.64403e-08	8.53592e-06	5.67391e-06	2.57836e-08
Human toxicity, cancer effects	4.87767e-05	9.77746e-06	6.04948e-07	1.9303e-06	8.07047e-08	2.15056e-05	1.4691e-05	1.8669e-07
Particulate matter	1.37292e-06	2.67467e-07	2.7988e-08	7.74833e-08	2.98643e-09	5.38966e-07	4.56385e-07	1.64096e-09
Acidification	1.8855e-06	2.72331e-07	1.96171e-08	7.53834e-08	4.80877e-09	8.18884e-07	6.92765e-07	1.70897e-09
Freshwater eutrophication	5.15976e-07	1.24373e-07	7.41408e-09	2.41438e-08	8.20487e-10	2.14839e-07	1.43766e-07	6.20118e-10
Freshwater ecotoxicity	0.00013825	1.41049e-05	6.57055e-07	2.00184e-06	2.66584e-07	7.29946e-05	4.8068e-05	1.57226e-07
Land use	1.44318e-09	3.43355e-10	3.80942e-11	9.25181e-11	2.42267e-12	5.74612e-10	3.90384e-10	1.78946e-12
Water resource depletion	4.28536e-07	3.37496e-07	6.55272e-09	1.5299e-08	1.86871e-10	3.76835e-08	3.11793e-08	1.38999e-10
Mineral, fossil & ren resource depletion	5.01412e-06	3.34218e-06	1.25641e-08	7.18234e-07	2.19318e-09	7.28451e-07	2.05142e-07	5.35525e-09
Impactos ambientales normalizados Espinosa et al. (2015)
Categoría de impacto	Total	PSC1.1 Capa de electrodo delantero	PSC1.2- Capa de transporte de electrones (Tio2)	PSC1.3- Capa de perovskita ( deposición por vapor)	PSC1.4 Capa de transporte de agujeros	PSC1.5 Capa de electrodo trasero
Categoría de impacto	7.307e-06	2.08776e-06	2.23464e-07	2.4428e-06	1.62623e-06	9.26747e-07
Human toxicity, non-cancer effects	6.7381e-05	1.94827e-05	1.82905e-06	2.16097e-05	1.33724e-05	1.10872e-05
Human toxicity, cancer effects	0.000174805	4.9079e-05	5.18349e-06	6.08869e-05	3.73485e-05	2.23066e-05
Particulate matter	5.02414e-06	1.25065e-06	1.52494e-07	1.90353e-06	1.16516e-06	5.52312e-07
Acidification	6.20395e-06	1.86869e-06	1.96834e-07	2.02973e-06	1.27598e-06	8.32711e-07
Freshwater eutrophication	1.93626e-06	4.83333e-07	5.36932e-08	7.18278e-07	4.35546e-07	2.45413e-07
Freshwater ecotoxicity	0.000500681	0.000158681	1.59264e-05	0.000149559	9.4565e-05	8.19501e-05
Land use	5.15806e-09	1.51187e-09	1.94881e-10	1.75199e-09	1.09533e-09	6.03985e-10
Water resource depletion	2.4495e-07	8.84219e-08	9.35432e-09	1.10508e-07	-7.90593e-10	3.7457e-08
Mineral, fossil & ren resource depletion	7.14786e-06	2.33436e-06	4.14256e-07	6.30411e-07	4.3573e-07	3.3331e-06
Impactos ambientales normalizados Espinosa et al. (2015) - CSP 3
Categoría de impacto	Total	PSC2.1 Capa de electrodo delantero	PSC2.2 Capa de transporte de electrones	PSC2.3 Capa de perovskita	PSC2.4 Capa de transporte de agujeros	PSC2.5 Capa de electrodo trasero
Climate change	4.76483e-06	6.28613e-07	4.22141e-07	2.79314e-06	4.69404e-09	9.16242e-07
Human toxicity, non-cancer effects	4.32493e-05	6.92228e-06	3.70655e-06	2.45502e-05	3.21099e-08	8.03818e-06
Human toxicity, cancer effects	0.000122299	1.5689e-05	1.89525e-05	6.61838e-05	7.95919e-08	2.13944e-05
Particulate matter	2.93168e-06	3.812e-07	2.48211e-07	1.76204e-06	3.16732e-09	5.3706e-07
Acidification	4.21813e-06	5.71631e-07	3.7618e-07	2.4504e-06	3.20199e-09	8.16715e-07
Freshwater eutrophication	1.13704e-06	1.48502e-07	9.6527e-08	6.81512e-07	8.57345e-10	2.09646e-07
Freshwater ecotoxicity	0.000356759	4.86095e-05	3.39932e-05	0.000203858	1.86442e-07	7.01121e-05
Land use	3.06797e-09	4.32045e-10	2.6506e-10	1.79676e-09	4.38325e-12	5.69721e-10
Water resource depletion	2.03458e-07	2.85823e-08	1.91173e-08	1.17429e-07	5.81438e-10	3.77472e-08
Mineral, fossil & ren resource depletion	4.28803e-06	3.05786e-06	1.31942e-07	8.18727e-07	9.76508e-10	2.7852e-07
Impactos ambientales normalizados Alberola et al. (2021) - CSP 4
Categoría de impacto	Total	PSC5.1 Capa de electrodo delantero	PSC5.2. Capa de transporte de electrones	PSC5.5. Capa de perovskita	PSC5.3 Capa de transporte de agujeros	PSC5.4. Capa de electrodo trasero	Globe box
Climate change	8.42244e-06	5.48296e-06	7.38226e-07	2.75977e-07	5.02197e-08	1.12699e-06	7.48064e-07
Human toxicity, non-cancer effects	0.00028807	3.72046e-05	6.47778e-06	2.45607e-06	5.0801e-07	0.00023575	5.67391e-06
Human toxicity, cancer effects	0.000192141	7.1284e-05	1.72859e-05	7.2048e-06	1.32704e-06	8.03482e-05	1.4691e-05
Particulate matter	8.2217e-06	5.79522e-06	4.33742e-07	2.55333e-07	4.47037e-08	1.23632e-06	4.56385e-07
Acidification	9.74682e-06	6.9408e-06	6.57023e-07	2.16682e-07	3.90407e-08	1.20051e-06	6.92765e-07
Freshwater eutrophication	4.69383e-06	9.78316e-07	1.70008e-07	9.48292e-08	1.50485e-08	3.29186e-06	1.43766e-07
Freshwater ecotoxicity	0.00115361	4.72338e-05	5.62907e-05	1.37275e-05	2.34765e-06	0.000985947	4.8068e-05
Land use	1.39985e-08	1.05463e-08	4.60573e-10	2.16657e-10	5.14536e-11	2.33311e-09	3.90384e-10
Water resource depletion	6.01403e-07	5.07925e-07	3.00938e-08	1.31366e-08	6.13612e-09	1.29321e-08	3.11793e-08
Mineral, fossil & ren resource depletion	6.69935e-05	8.74552e-06	2.43408e-07	6.14725e-08	8.18189e-08	5.76561e-05	2.05142e-07
Impactos ambientales normalizados Alberola et al. (2021) - CSP 5
Categoría de impacto	Total	PSC5.1 Capa de electrodo delantero	PSC5.2. Capa de transporte de electrones	PSC5.6. Capa de perovskita (Dispositivo 2)	PSC5.3 Capa de transporte de agujeros	PSC5.4. Capa de electrodo trasero	Globe box
Climate change	8.20404e-06	5.48296e-06	7.38226e-07	5.7582e-08	5.02197e-08	1.12699e-06	7.48064e-07
Human toxicity, non-cancer effects	0.000286125	3.72046e-05	6.47778e-06	5.1129e-07	5.0801e-07	0.00023575	5.67391e-06
Human toxicity, cancer effects	0.000186281	7.1284e-05	1.72859e-05	1.34515e-06	1.32704e-06	8.03482e-05	1.4691e-05
Particulate matter	8.00042e-06	5.79522e-06	4.33742e-07	3.40556e-08	4.47037e-08	1.23632e-06	4.56385e-07
Acidification	9.58128e-06	6.9408e-06	6.57023e-07	5.11422e-08	3.90407e-08	1.20051e-06	6.92765e-07
Freshwater eutrophication	4.61228e-06	9.78316e-07	1.70008e-07	1.32815e-08	1.50485e-08	3.29186e-06	1.43766e-07
Freshwater ecotoxicity	0.00114423	4.72338e-05	5.62907e-05	4.34717e-06	2.34765e-06	0.000985947	4.8068e-05
Land use	1.38184e-08	1.05463e-08	4.60573e-10	3.66008e-11	5.14536e-11	2.33311e-09	3.90384e-10
Water resource depletion	5.90687e-07	5.07925e-07	3.00938e-08	2.42099e-09	6.13612e-09	1.29321e-08	3.11793e-08
Mineral, fossil & ren resource depletion	6.69586e-05	8.74552e-06	2.43408e-07	2.65927e-08	8.18189e-08	5.76561e-05	2.05142e-07

## Sheet: Gráfica Normalizada 1 -5
			CED	CTE	PER	CTH	CET	GB	CSA	TOTAL
CC
	C1		3.55722e-07	3.41589e-08	8.56231e-08	3.10684e-09	9.17583e-07	7.48064e-07	1.87991e-09	2.14614e-06
	C2		2.08776e-06	2.23464e-07	2.4428e-06	1.62623e-06	9.26747e-07	0	0	7.307e-06
	C3		6.28613e-07	4.22141e-07	2.79314e-06	4.69404e-09	9.16242e-07	0	0	4.76483e-06
	C4		5.48296e-06	7.38226e-07	2.75977e-07	5.02197e-08	1.12699e-06	7.48064e-07	0	8.42244e-06
	C5		5.48296e-06	7.38226e-07	5.7582e-08	5.02197e-08	1.12699e-06	7.48064e-07	0	8.20404e-06
THCN
	C1		4.10043e-06	2.35354e-07	1.1048e-06	3.64403e-08	8.53592e-06	5.67391e-06	2.57836e-08	1.97126e-05
	C2		1.94827e-05	1.82905e-06	2.16097e-05	1.33724e-05	1.10872e-05	0	0	6.7381e-05
	C3		6.92228e-06	3.70655e-06	2.45502e-05	3.21099e-08	8.03818e-06	0	0	4.32493e-05
	C4		3.72046e-05	6.47778e-06	2.45607e-06	5.0801e-07	0.00023575	5.67391e-06	0	0.00028807
	C5		3.72046e-05	6.47778e-06	5.1129e-07	5.0801e-07	0.00023575	5.67391e-06	0	0.000286125
THC
	C1		9.77746e-06	6.04948e-07	1.9303e-06	8.07047e-08	2.15056e-05	1.4691e-05	1.8669e-07	4.87767e-05
	C2		4.9079e-05	5.18349e-06	6.08869e-05	3.73485e-05	2.23066e-05	0	0	0.000174805
	C3		1.5689e-05	1.89525e-05	6.61838e-05	7.95919e-08	2.13944e-05	0	0	0.000122299
	C4		7.1284e-05	1.72859e-05	7.2048e-06	1.32704e-06	8.03482e-05	1.4691e-05	0	0.000192141	0.418173
	C5		7.1284e-05	1.72859e-05	1.34515e-06	1.32704e-06	8.03482e-05	1.4691e-05	0	0.000186281
MP
	C1		2.67467e-07	2.7988e-08	7.74833e-08	2.98643e-09	5.38966e-07	4.56385e-07	1.64096e-09	1.37292e-06
	C2		1.25065e-06	1.52494e-07	1.90353e-06	1.16516e-06	5.52312e-07	0	0	5.02414e-06
	C3		3.812e-07	2.48211e-07	1.76204e-06	3.16732e-09	5.3706e-07	0	0	2.93168e-06
	C4		5.79522e-06	4.33742e-07	2.55333e-07	4.47037e-08	1.23632e-06	4.56385e-07	0	8.2217e-06
	C5		5.79522e-06	4.33742e-07	3.40556e-08	4.47037e-08	1.23632e-06	4.56385e-07	0	8.00042e-06
Ac
	C1		2.72331e-07	1.96171e-08	7.53834e-08	4.80877e-09	8.18884e-07	6.92765e-07	1.70897e-09	1.8855e-06
	C2		1.86869e-06	1.96834e-07	2.02973e-06	1.27598e-06	8.32711e-07	0	0	6.20395e-06
	C3		5.71631e-07	3.7618e-07	2.4504e-06	3.20199e-09	8.16715e-07	0	0	4.21813e-06
	C4		6.9408e-06	6.57023e-07	2.16682e-07	3.90407e-08	1.20051e-06	6.92765e-07	0	9.74682e-06
	C5		6.9408e-06	6.57023e-07	5.11422e-08	3.90407e-08	1.20051e-06	6.92765e-07	0	9.58128e-06

## Sheet: Gráfica Normalizada 5- 10
			CED	CTE	PER	CTH	CET	GB	CSA	TOTAL
EAD
	C1		1.24373e-07	7.41408e-09	2.41438e-08	8.20487e-10	2.14839e-07	1.43766e-07	6.20118e-10	5.15976e-07
	C2		4.83333e-07	5.36932e-08	7.18278e-07	4.35546e-07	2.45413e-07	0	0	1.93626e-06
	C3		1.48502e-07	9.6527e-08	6.81512e-07	8.57345e-10	2.09646e-07	0	0	1.13704e-06
	C4		9.78316e-07	1.70008e-07	9.48292e-08	1.50485e-08	3.29186e-06	1.43766e-07	0	4.69383e-06
	C5		9.78316e-07	1.70008e-07	1.32815e-08	1.50485e-08	3.29186e-06	1.43766e-07	0	4.61228e-06
EA
	C1		1.41049e-05	6.57055e-07	2.00184e-06	2.66584e-07	7.29946e-05	4.8068e-05	1.57226e-07	0.00013825
	C2		0.000158681	1.59264e-05	0.000149559	9.4565e-05	8.19501e-05	0	0	0.000500681	3
	C3		4.86095e-05	3.39932e-05	0.000203858	1.86442e-07	7.01121e-05	0	0	0.000356759	4
	C4		4.72338e-05	5.62907e-05	1.37275e-05	2.34765e-06	0.000985947	4.8068e-05	0	0.00115361	1
	C5		4.72338e-05	5.62907e-05	4.34717e-06	2.34765e-06	0.000985947	4.8068e-05	0	0.00114423	2
US
	C1		3.43355e-10	3.80942e-11	9.25181e-11	2.42267e-12	5.74612e-10	3.90384e-10	1.78946e-12	1.44318e-09
	C2		1.51187e-09	1.94881e-10	1.75199e-09	1.09533e-09	6.03985e-10	0	0	5.15806e-09
	C3		4.32045e-10	2.6506e-10	1.79676e-09	4.38325e-12	5.69721e-10	0	0	3.06797e-09
	C4		1.05463e-08	4.60573e-10	2.16657e-10	5.14536e-11	2.33311e-09	3.90384e-10	0	1.39985e-08
	C5		1.05463e-08	4.60573e-10	3.66008e-11	5.14536e-11	2.33311e-09	3.90384e-10	0	1.38184e-08
ARH
	C1		3.37496e-07	6.55272e-09	1.5299e-08	1.86871e-10	3.76835e-08	3.11793e-08	1.38999e-10	4.28536e-07
	C2		8.84219e-08	9.35432e-09	1.10508e-07	-7.90593e-10	3.7457e-08	0	0	2.4495e-07
	C3		2.85823e-08	1.91173e-08	1.17429e-07	5.81438e-10	3.77472e-08	0	0	2.03458e-07
	C4		5.07925e-07	3.00938e-08	1.31366e-08	6.13612e-09	1.29321e-08	3.11793e-08	0	6.01403e-07
	C5		5.07925e-07	3.00938e-08	2.42099e-09	6.13612e-09	1.29321e-08	3.11793e-08	0	5.90687e-07
ARMFR
	C1		3.34218e-06	1.25641e-08	7.18234e-07	2.19318e-09	7.28451e-07	2.05142e-07	5.35525e-09	5.01412e-06
	C2		2.33436e-06	4.14256e-07	6.30411e-07	4.3573e-07	3.3331e-06	0	0	7.14786e-06
	C3		3.05786e-06	1.31942e-07	8.18727e-07	9.76508e-10	2.7852e-07	0	0	4.28803e-06
	C4		8.74552e-06	2.43408e-07	6.14725e-08	8.18189e-08	5.76561e-05	2.05142e-07	0	6.69935e-05
	C5		8.74552e-06	2.43408e-07	2.65927e-08	8.18189e-08	5.76561e-05	2.05142e-07	0	6.69586e-05

## Sheet: Gráfica DEA 
			CED	CTE	PER	CTH	CED	GB	CSA	TOTAL
Fosil, No renovable
	C1		0.047991	0.00451182	0.0146894	0.000245526	0.0729779	0.0596447	0.000149765	0.20021
	C2		0.166239	0.0187506	0.19583	0.123125	0.0737845			0.577728
	C3		0.0500865	0.0336234	0.222508	0.000484111	0.072854			0.379556	0.000668885
	C4		0.517737	0.0593038	0.0222596	0.00573	0.0948907	0.0596447		0.759566	0.00767934
	C5		0.517737	0.0593038	0.00468472	0.00573	0.0948907	0.0596447		0.741991
Nuclear, No renovable
	C1		0.00187985	0.000115559	0.000506172	2.33316e-06	0.000266397	0.00751856	6.37508e-06	0.0102952
	C2		0.000753181	0.000125618	0.00673174	0.00370734	0.000376867			0.0116947
	C3		0.000320616	0.000118609	0.00236836	6.80749e-06	0.000247847			0.00306224
	C4		0.0154462	0.000224088	0.00127832	0.00017674	0.0110617	0.00751856		0.0357056
	C5		0.0154462	0.000224088	2.29295e-05	0.00017674	0.0110617	0.00751856		0.0344502
Biomasa, No renovable
	C1		6.8047e-05	1.58238e-08	4.24978e-08	7.66257e-10	1.5674e-07	1.05607e-07	1.34859e-09	6.83697e-05
	C2		3.94028e-07	6.96877e-08	1.97184e-06	1.11947e-06	1.7218e-07			3.72721e-06
	C3		1.20145e-07	7.18628e-08	8.83283e-07	1.57997e-09	1.54239e-07			1.23111e-06
	C4		9.31346e-05	1.25963e-07	3.54639e-07	2.00472e-08	2.01707e-06	1.05607e-07		9.57579e-05
	C5		9.31346e-05	1.25963e-07	1.02254e-08	2.00472e-08	2.01707e-06	1.05607e-07		9.54135e-05
Biomasa ,Renovable
	C1		0.000727	1.96786e-05	9.91646e-05	7.64921e-07	0.000140269	9.44263e-05	1.18098e-06	0.00108248
	C2		0.000401654	3.88586e-05	0.00100305	0.000820037	0.000155541			0.00241914
	C3		0.000143175	6.53556e-05	0.000588538	1.27731e-06	0.000137795			0.000936141
	C4		0.0105878	0.000117531	0.000167476	3.41487e-05	0.00129267	9.44263e-05		0.0122941
	C5		0.0105878	0.000117531	9.98179e-06	3.41487e-05	0.00129267	9.44263e-05		0.0121366
Solar, eólica, geotérmica, renovable
	C1		9.53469e-05	8.2925e-06	2.76706e-05	4.88017e-07	0.000104971	0.000431367	8.80752e-07	0.000669017
	C2		0.00025357	3.74188e-05	0.00107268	0.000591039	0.000117416			0.00207212
	C3		8.45289e-05	4.77005e-05	0.000525462	7.53515e-07	0.000102835			0.000761281
	C4		0.00118429	8.32984e-05	0.000188998	1.5212e-05	0.00122246	0.000431367		0.00312563
	C5		0.00118429	8.32984e-05	6.85743e-06	1.5212e-05	0.00122246	0.000431367		0.00294349
Agua, renovable
	C1		0.00954142	0.000381171	0.000646134	0.000224748	0.0696547	0.0486359	9.94103e-05	0.129184
	C2		0.155906	0.0157219	0.143547	0.0910097	0.0697015			0.475887
	C3		0.0458495	0.0319318	0.201178	0.000175935	0.0696486			0.348784
	C4		0.0135671	0.0558048	0.0126342	0.00172322	0.0303222	0.0486359		0.162687
	C5		0.0135671	0.0558048	0.00430206	0.00172322	0.0303222	0.0486359		0.154355
					0.0159686
		SUMA DE ENERGÍA PRIMARIA ( FOSIL + AGUA)
			CED	CTE	PER	CTH	CET	GB	CSA
		C1	0.0603027	0.00503654	0.0159686	0.000473861	0.143144	0.116325	0.000257613
		C2	0.323554	0.0346744	0.348187	0.219254	0.144136	0	0
		C3	0.0964844	0.0657869	0.42717	0.000668885	0.142991	0	0
		C4	0.558615	0.115534	0.0365289	0.00767934	0.138792	0.116325	0
		C5	0.558615	0.115534	0.00902655	0.00767934	0.138792	0.116325	0
		TOTAL	1.59757	0.336565	0.836881	0.235755	0.707855	0.348975	0.000257613

## Sheet: DWR
SimaPro 9.5.0.2	Contribución de proceso
Proyecto	ACV_CELULASFOTOVOLTAICAS
Calculation:	Analizar
Results:	Contribución proceso
Product:	1 cm2 CSP1_Ramirez et al.(2019) (del proyecto ACV_CELULASFOTOVOLTAICAS)
Método:	ILCD 2011 Midpoint+ V1.11 / EC-JRC Global, equal weighting
Indicador:	Normalización
Categoría:	Water resource depletion
Cortar:	0,5 %
Excluir procesos de infrastructura:	No
Excluir emisiones a largo plazo:	No
Modo relativo:	Vertical
Sorted on item:	Total
Sort order:	Descendente
No	Process	Total	FEL	HTL	MSL	PAL	ETL	BEL	GB
	Remaining processes	0.022222	1.42502	1.49217	57.4466	3.19235	63.9361	-0.103864	0
1	Water, deionised, from tap water, at user {GLO}| market for | Cut-off, S	0.597409	76.0265	3.62317	4.86072	0	0	0	0
2	Electricity, low voltage {CO}| market for electricity, low voltage | Cut-off, S	0.163258	1.44257	94.8847	37.6927	1.46875	2.85084	100.104	82.929
3	Soap {GLO}| market for | Cut-off, S	0.119259	15.18	0	0	0	0	0	0
4	Acetone, liquid {GLO}| market for | Cut-off, S	0.037545	4.77898	0	0	0	0	0	0
5	Acetonitrile {GLO}| market for | Cut-off, S	0.0217292	0	0	0	61.2236	0	0	0
6	Nitrogen, via cryogenic air separation, production mix, at plant, gaseous EU-27 S System - Copied from ELCD	0.0123928	0	0	0	0	0	0	17.071
7	Diethyl ether, without water, in 99.95% solution state {GLO}| market for | Cut-off, S	0.012108	0	0	0	34.1153	0	0	0
8	Isopropanol {GLO}| market for | Cut-off, S	0.00901051	1.14692	0	0	0	0	0	0
9	Tap water {RoW}| tap water production, conventional treatment | Cut-off, S	0.00506726	0	0	0	0	33.2131	0	0

## Sheet: DMFR
SimaPro 9.5.0.2	Contribución de proceso	Período:
Proyecto	ACV_CELULASFOTOVOLTAICAS
Calculation:	Analizar
Results:	Contribución proceso
Product:	1 cm2 CSP1_Ramirez et al.(2019) (del proyecto ACV_CELULASFOTOVOLTAICAS)
Método:	ILCD 2011 Midpoint+ V1.11 / EC-JRC Global, equal weighting
Indicador:	Normalización
Categoría:	Mineral, fossil & ren resource depletion
Cortar:	0,5 %
Excluir procesos de infrastructura:	No
Excluir emisiones a largo plazo:	No
Modo relativo:	Total
Sorted on item:	Total
Sort order:	Descendente
No	Process	Total	FEL	HTL	MSL	PAL	ETL	BEL	GB
	Remaining processes	0.0161533	0.87258	0.0257345	0.0989285	0.110115	0.222765	0	0.285207
1	Indium {GLO}| market for | Cut-off, S	0.569945	56.9945	0	0	0	0	0	0
2	Electricity, low voltage {CO}| market for electricity, low voltage | Cut-off, S	0.103057	0.715411	0.177603	0.00770043	0.0329061	0.0274562	5.54431	3.80031
3	Silver {GLO}| market for | Cut-off, S	0.0896322	0	0	0	0	0	8.96322	0
4	Lead {GLO}| market for | Cut-off, S	0.0646483	0	0	0	6.46483	0	0	0
5	Diethyl ether, without water, in 99.95% solution state {GLO}| market for | Cut-off, S	0.0606818	0	0	0	6.06818	0	0	0
6	Isopropanol {GLO}| market for | Cut-off, S	0.0569273	5.69273	0	0	0	0	0	0
7	Iodine {GLO}| market for | Cut-off, S	0.0109773	0	0	0	1.09773	0	0	0
8	Water, deionised, from tap water, at user {GLO}| market for | Cut-off, S	0.00911704	0.911516	0.000163954	2.40069e-05	0	0	0	0
9	Acetone, liquid {GLO}| market for | Cut-off, S	0.00807694	0.807694	0	0	0	0	0	0
10	Flat glass, uncoated {GLO}| market for | Cut-off, S	0.00556302	0.556302	0	0	0	0	0	0
11	Acetonitrile {GLO}| market for | Cut-off, S	0.00522131	0	0	0	0.522131	0	0	0

## Sheet: ILCD_EC_JRCNormalized
SimaPro 9.5.0.2	Análisis de impacto		Período:	15:29:06.057000	Fecha:	2024-03-22
Proyecto	ACV_CELULASFOTOVOLTAICAS
Calculation:	Analizar
Results:	Evaluación del impacto
Product:	1 cm2 CSP1_Ramirez et al.(2019) (del proyecto ACV_CELULASFOTOVOLTAICAS)
Método:	ILCD 2011 Midpoint+ V1.11 / EC-JRC Global, equal weighting
Indicador:	Normalización
Skip categories:	Nunca
Excluir procesos de infrastructura:	No
Excluir emisiones a largo plazo:	No
Sorted on item:	Categoría de impacto
Sort order:	Ascendente
Categoría de impacto	Total	FEL	HTL	MSL	PAL	ETL	BEL	GB
Climate change	2.16943e-06	3.53955e-07	2.95122e-08	1.87991e-09	8.42733e-08	3.41589e-08	9.17583e-07	7.48064e-07
Ozone depletion	8.32923e-08	1.26673e-08	8.9087e-10	1.82092e-10	5.10819e-09	1.69384e-09	2.70085e-08	3.57415e-08
Human toxicity, non-cancer effects	1.99169e-05	4.08493e-06	2.6809e-07	2.57836e-08	1.09296e-06	2.35354e-07	8.53592e-06	5.67391e-06
Human toxicity, cancer effects	4.93199e-05	9.73624e-06	6.9665e-07	1.8669e-07	1.89881e-06	6.04948e-07	2.15056e-05	1.4691e-05
Particulate matter	1.38656e-06	2.66431e-07	1.84566e-08	1.64096e-09	7.66925e-08	2.7988e-08	5.38966e-07	4.56385e-07
Ionizing radiation HH	2.03282e-06	3.32191e-07	1.00108e-08	2.12435e-09	9.09147e-08	2.92678e-08	3.04428e-07	1.26388e-06
Ionizing radiation E (interim)	0	0	0	0	0	0	0	0
Photochemical ozone formation	9.18342e-07	1.94952e-07	1.18245e-08	8.51738e-10	4.05895e-08	1.5969e-08	3.62652e-07	2.91503e-07
Acidification	1.90626e-06	2.70756e-07	2.83458e-08	1.70897e-09	7.41802e-08	1.96171e-08	8.18884e-07	6.92765e-07
Terrestrial eutrophication	8.30127e-07	1.44069e-07	1.08728e-08	8.22854e-10	5.77911e-08	1.02661e-08	3.3703e-07	2.69276e-07
Freshwater eutrophication	5.21304e-07	1.23969e-07	6.86129e-09	6.20118e-10	2.3835e-08	7.41408e-09	2.14839e-07	1.43766e-07
Marine eutrophication	4.43877e-07	8.09925e-08	5.3648e-09	4.15283e-10	5.19404e-08	5.23051e-09	1.66624e-07	1.33309e-07
Freshwater ecotoxicity	0.000140033	1.39696e-05	2.28755e-06	1.57226e-07	1.89853e-06	6.57055e-07	7.29946e-05	4.8068e-05
Land use	1.45766e-09	3.42256e-10	1.88406e-11	1.78946e-12	9.16788e-11	3.80942e-11	5.74612e-10	3.90384e-10
Water resource depletion	4.29494e-07	3.37423e-07	1.27353e-09	1.38999e-10	1.52434e-08	6.55272e-09	3.76835e-08	3.11793e-08
Mineral, fossil & ren resource depletion	5.02119e-06	3.34164e-06	1.02182e-08	5.35525e-09	7.17824e-07	1.25641e-08	7.28451e-07	2.05142e-07

## Sheet: ReCiPe 2016_World 2010 Normaliz
SimaPro 9.5.0.2	Análisis de impacto		Período:	15:40:01.533000	Fecha:	2024-03-22
Proyecto	ACV_CELULASFOTOVOLTAICAS
Calculation:	Analizar
Results:	Evaluación del impacto
Product:	1 cm2 CSP1_Ramirez et al.(2019) (del proyecto ACV_CELULASFOTOVOLTAICAS)
Método:	ReCiPe 2016 Midpoint (H) V1.04 / World (2010) H
Indicador:	Normalización
Skip categories:	Nunca
Excluir procesos de infrastructura:	No
Excluir emisiones a largo plazo:	No
Sorted on item:	Categoría de impacto
Sort order:	Ascendente
Categoría de impacto	Total	FEL	HTL	MSL	PAL	ETL	BEL	GB
Global warming	2.003e-06	3.25256e-07	2.72817e-08	1.73171e-09	7.81759e-08	3.15927e-08	8.48324e-07	6.90633e-07
Stratospheric ozone depletion	1.16213e-07	1.56824e-08	1.73252e-09	1.2724e-10	6.15038e-09	2.22436e-09	5.01735e-08	4.01226e-08
Ionizing radiation	4.95945e-07	1.18021e-07	1.54837e-09	7.42394e-10	3.13366e-08	8.34031e-09	4.50511e-08	2.90905e-07
Ozone formation, Human health	1.4786e-06	2.74516e-07	1.97402e-08	1.49195e-09	5.63306e-08	2.06364e-08	6.13307e-07	4.92577e-07
Fine particulate matter formation	9.79448e-07	1.51318e-07	1.43477e-08	9.72548e-10	3.54672e-08	1.20658e-08	4.15029e-07	3.50248e-07
Ozone formation, Terrestrial ecosystems	1.75609e-06	3.37902e-07	2.31929e-08	1.75137e-09	6.94489e-08	2.54157e-08	7.20565e-07	5.77813e-07
Terrestrial acidification	1.84081e-06	2.56489e-07	2.75838e-08	1.63144e-09	7.09784e-08	1.85581e-08	7.92417e-07	6.73155e-07
Freshwater eutrophication	5.24497e-06	1.24688e-06	6.90632e-08	6.24018e-09	2.39604e-07	7.4577e-08	2.16254e-06	1.44606e-06
Marine eutrophication	1.35291e-07	3.12256e-08	5.63307e-10	6.0085e-11	7.3318e-08	6.90809e-10	1.72338e-08	1.2199e-08
Terrestrial ecotoxicity	4.21924e-05	6.27566e-06	6.3699e-07	4.08217e-08	2.04148e-06	6.49645e-07	1.91929e-05	1.33549e-05
Freshwater ecotoxicity	0.00129475	0.000136397	2.10194e-05	1.36974e-06	1.92191e-05	5.78698e-06	0.000670095	0.000440864
Marine ecotoxicity	0.00191064	0.000207067	3.07705e-05	2.02623e-06	3.06755e-05	8.11188e-06	0.00098694	0.000645048
Human carcinogenic toxicity	0.00016945	3.15571e-05	2.43716e-06	5.97857e-07	5.95451e-06	2.1122e-06	7.53408e-05	5.145e-05
Human non-carcinogenic toxicity	8.63801e-05	1.79159e-05	1.18018e-06	9.91837e-08	4.31098e-06	8.4511e-07	3.77573e-05	2.42715e-05
Land use	2.07577e-08	1.23189e-08	1.3557e-10	1.9228e-11	1.02667e-09	2.5217e-10	4.22211e-09	2.783e-09
Mineral resource scarcity	1.00482e-09	4.78873e-10	4.0905e-12	9.32295e-13	3.34809e-10	1.68454e-12	1.20656e-10	6.37767e-11
Fossil resource scarcity	4.44894e-06	1.06756e-06	5.24111e-08	3.3395e-09	3.25197e-07	1.00524e-07	1.63093e-06	1.26898e-06
Water consumption	1.09668e-06	5.35151e-07	9.51198e-09	7.08816e-10	3.69344e-08	1.2789e-08	2.92696e-07	2.08892e-07

## Sheet: Normalized graph_1
			FEL	HTL	MSL	PAL	ETL	BEL	GB	TOTAL
CC
	ILCD		3.53955e-07	2.95122e-08	1.87991e-09	8.42733e-08	3.41589e-08	9.17583e-07	7.48064e-07	2.16943e-06
	ReCiPe		3.25256e-07	2.72817e-08	1.73171e-09	7.81759e-08	3.15927e-08	8.48324e-07	6.90633e-07	2.003e-06
MP
	ILCD		2.66431e-07	1.84566e-08	1.64096e-09	7.66925e-08	2.7988e-08	5.38966e-07	4.56385e-07	1.38656e-06
	ReCiPe		1.51318e-07	1.43477e-08	9.72548e-10	3.54672e-08	1.20658e-08	4.15029e-07	3.50248e-07	9.79448e-07
AC
	ILCD		2.70756e-07	2.83458e-08	1.70897e-09	7.41802e-08	1.96171e-08	8.18884e-07	6.92765e-07	1.90626e-06
	ReCiPe		2.56489e-07	2.75838e-08	1.63144e-09	7.09784e-08	1.85581e-08	7.92417e-07	6.73155e-07	1.84081e-06
FE
	ILCD		1.23969e-07	6.86129e-09	6.20118e-10	2.3835e-08	7.41408e-09	2.14839e-07	1.43766e-07	5.21304e-07
	ReCiPe		1.24688e-06	6.90632e-08	6.24018e-09	2.39604e-07	7.4577e-08	2.16254e-06	1.44606e-06	5.24497e-06
DMFR
	ILCD		3.34164e-06	1.02182e-08	5.35525e-09	7.17824e-07	1.25641e-08	7.28451e-07	2.05142e-07	5.02119e-06
	ReCiPe		1.06804e-06	5.24152e-08	3.34043e-09	3.25532e-07	1.00526e-07	1.63105e-06	1.26905e-06	4.44995e-06
DWR
	ILCD		3.37423e-07	1.27353e-09	1.38999e-10	1.52434e-08	6.55272e-09	3.76835e-08	3.11793e-08	4.29494e-07
	ReCiPe		5.35151e-07	9.51198e-09	7.08816e-10	3.69344e-08	1.2789e-08	2.92696e-07	2.08892e-07	1.09668e-06
LU
	ILCD		3.42256e-10	1.88406e-11	1.78946e-12	9.16788e-11	3.80942e-11	5.74612e-10	3.90384e-10	1.45766e-09
	ReCiPe		1.23189e-08	1.3557e-10	1.9228e-11	1.02667e-09	2.5217e-10	4.22211e-09	2.783e-09	2.07577e-08

[truncated: 6 more sheets: Normalized graph_2, Normalized graph1.1, Normalized graph2.1, CED, CED_2, CED_Comparative]
